# Supplementary material for: Association of Tim-3/Gal-9 Axis with NLRC4 Inflammasome in Glioma Malignancy: Tim-3/Gal-9 Induce the NLRC4 Inflammasome
Source: Int J Mol Sci. 2022 Feb 12;23(4):2028. doi: 10.3390/ijms23042028 (PMC8878774; doi:10.3390/ijms23042028)
Supplement: Supplementary file 1 [file ijms-23-02028-s001.zip › Table S4.xlsx]

## Sheet: HAVCR2
Supplementary Table S4. Correlation analysis of Tim-3 and Gal-9. HAVCR2: Tim-3. LGALS9: Gal-9. p: p-value.
Gene	Correlation coefficient	T-score	p
HAVCR2	1
CD53	0.972509	96.5968	0
LAPTM5	0.970571	93.2225	0
SASH3	0.959257	78.5312	7.5488e-296
CD86	0.956767	76.086	4.212e-289
BTK	0.954538	74.0664	2.1586e-283
LAT2	0.954175	73.7518	1.719e-282
NCKAP1L	0.952413	72.2726	3.265e-278
ITGB2	0.95037	70.6541	1.8977e-273
LY86	0.943696	65.9822	3.4605e-259
SPI1	0.94228	65.0935	2.1953e-256
LAIR1	0.941904	64.8631	1.1825e-255
ADORA3	0.941617	64.6886	4.248e-255
SAMSN1	0.939021	63.1643	3.3757e-250
ARL11	0.937482	62.3044	2.1514e-247
TREM2	0.937315	62.2128	4.2984e-247
LILRB4	0.934943	60.951	6.407e-243
C3AR1	0.932024	59.4867	5.3872e-238
HCK	0.931256	59.1163	9.807e-237
TYROBP	0.929884	58.4699	1.6005e-234
GPSM3	0.929766	58.415	2.4726e-234
SYK	0.929689	58.3793	3.2799e-234
FCGR1A	0.928111	57.6608	9.9878e-232
SLC7A7	0.927871	57.5535	2.3561e-231
VAV1	0.926935	57.1396	6.5283e-230
ALOX5	0.922679	55.3511	1.3693e-223
C1QC	0.92147	54.8685	7.3653e-222
CD33	0.921274	54.7914	1.3953e-221
FCER1G	0.920744	54.5841	7.7982e-221
FERMT3	0.920285	54.406	3.4333e-220
LGALS9	0.920018	54.3031	8.0908e-220
TBXAS1	0.919796	54.2178	1.6501e-219
CD37	0.919687	54.1762	2.3341e-219
CD300C	0.91957	54.1317	3.3862e-219
C17orf60	0.919496	54.1032	4.2973e-219
ABI3	0.919061	53.9383	1.709e-218
CD68	0.918165	53.6025	2.8685e-217
LILRB1	0.916867	53.1251	1.6154e-215
PTPN6	0.915403	52.5996	1.4049e-213
APBB1IP	0.914117	52.1483	6.6623e-212
AIF1	0.913782	52.0323	1.8015e-211
CD300A	0.913594	51.9677	3.1394e-211
ADAP2	0.913423	51.9091	5.1971e-211
TNFAIP8L2	0.913316	51.8724	7.1287e-211
MYO1F	0.913264	51.8545	8.3162e-211
IL18	0.913102	51.7991	1.3393e-210
PARVG	0.912558	51.6143	6.5957e-210
C1QB	0.91201	51.4297	3.2531e-209
PLEK	0.911818	51.3655	5.6715e-209
HLA-DMB	0.911491	51.2566	1.4579e-208
RNASET2	0.909014	50.4494	1.6623e-205
RASGRP4	0.908833	50.3915	2.7621e-205
EVI2B	0.908686	50.3448	4.1615e-205
C3	0.90827	50.213	1.3243e-204
LPAR5	0.90793	50.1058	3.4029e-204
TFEC	0.904889	49.1725	1.3254e-200
CYTH4	0.904584	49.0811	2.9966e-200
FPR1	0.903638	48.8008	3.6718e-199
SIGLEC9	0.903624	48.7966	3.8103e-199
CYBB	0.903168	48.6628	1.265e-198
DAPP1	0.902341	48.4226	1.0949e-197
CCR1	0.902092	48.3507	2.0917e-197
PIK3R5	0.900518	47.9029	1.1953e-195
GNGT2	0.900498	47.8973	1.258e-195
CTSS	0.90012	47.7913	3.2884e-195
STXBP2	0.899748	47.6874	8.4472e-195
SCIN	0.898512	47.3464	1.8846e-193
RIPK3	0.897551	47.0854	2.0496e-192
CYBA	0.89694	46.921	9.2444e-192
ARHGDIB	0.896319	46.7557	4.2231e-191
CSF3R	0.895402	46.5139	3.9179e-190
HCLS1	0.894185	46.1975	7.2958e-189
CD4	0.892429	45.7502	4.6581e-187
IL12RB1	0.89226	45.7076	6.9243e-187
RPS6KA1	0.891911	45.6202	1.5658e-186
KCNK13	0.8913	45.4679	6.4928e-186
TLR7	0.891017	45.398	1.2489e-185
HCST	0.890718	45.3242	2.4931e-185
RNASE6	0.890338	45.2307	5.988e-185
BIN2	0.889737	45.0841	2.372e-184
LOC100233209	0.888671	44.8266	2.6804e-183
PTPRC	0.888493	44.784	4.0055e-183
LILRA2	0.88845	44.7737	4.4139e-183
ARHGAP9	0.887222	44.4821	6.9528e-182
WAS	0.887048	44.4412	1.0246e-181
TLR2	0.886859	44.3969	1.5584e-181
LRRC25	0.886216	44.2467	6.4847e-181
VAMP8	0.885922	44.1783	1.242e-180
LCP1	0.885377	44.0525	4.1126e-180
IKZF1	0.885376	44.0522	4.1241e-180
DOCK2	0.884489	43.8491	2.862e-179
ALOX5AP	0.884065	43.7529	7.1795e-179
LST1	0.883763	43.6844	1.3823e-178
RGS10	0.881435	43.1663	2e-176
CEBPA	0.881222	43.1196	3.1366e-176
ITGAL	0.880901	43.0494	6.1725e-176
SERPINA1	0.880116	42.879	3.2023e-175
ARHGAP15	0.87906	42.6521	2.8813e-174
C16orf54	0.878422	42.5163	1.0775e-173
FBP1	0.878085	42.4452	2.1503e-173
IRF5	0.877325	42.2852	1.0201e-172
FCGR2A	0.876558	42.1255	4.8459e-172
GPR34	0.876147	42.0405	1.1114e-171
C1QA	0.876047	42.0198	1.3611e-171
ARHGAP30	0.875691	41.9464	2.7891e-171
FCGR1B	0.875057	41.8167	9.9353e-171
NCF4	0.874444	41.6921	3.3739e-170
NLRC4	0.874412	41.6857	3.5934e-170
SLC2A5	0.874067	41.6159	7.1269e-170
ITGAM	0.874045	41.6115	7.4479e-170
TNFSF8	0.873995	41.6014	8.2228e-170
FCGR1C	0.871895	41.1829	5.0836e-168
GPR160	0.87151	41.1072	1.0745e-167
PYCARD	0.870624	40.9344	5.948e-167
TMEM106A	0.870428	40.8962	8.6816e-167
TLR1	0.870426	40.8958	8.7183e-167
CSF2RB	0.870284	40.8683	1.145e-166
NCF1	0.870259	40.8634	1.2021e-166
VSIG4	0.869998	40.8132	1.9798e-166
HLA-DMA	0.869468	40.7112	5.454e-166
IGSF6	0.868683	40.5611	2.4276e-165
CYTIP	0.867542	40.3452	2.0899e-164
FYB	0.866664	40.1811	1.0782e-163
ARPC1B	0.866567	40.1629	1.2937e-163
CCR5	0.866249	40.104	2.3339e-163
LCP2	0.866149	40.0854	2.8107e-163
HPGDS	0.866102	40.0766	3.0711e-163
MNDA	0.866	40.0577	3.7087e-163
GPR65	0.864913	39.8579	2.7562e-162
APOC2	0.864731	39.8245	3.8531e-162
FCGR3A	0.864228	39.7329	9.6837e-162
C12orf59	0.862955	39.5031	9.8097e-161
IL10RA	0.861116	39.1766	2.6661e-159
C17orf87	0.860377	39.0469	9.9262e-159
SLC15A3	0.859508	38.8957	4.6145e-158
DEF6	0.859105	38.8262	9.3587e-158
RHBDF2	0.858549	38.7304	2.4814e-157
LYN	0.858166	38.6648	4.8399e-157
KCNQ1	0.857873	38.6147	8.072e-157
PIK3AP1	0.857833	38.6079	8.6504e-157
LPXN	0.857187	38.4982	2.6529e-156
FAM113B	0.857136	38.4896	2.8947e-156
CD180	0.856383	38.3625	1.062e-155
CMTM7	0.856269	38.3435	1.29e-155
CLEC7A	0.855747	38.256	3.1608e-155
TRAF3IP3	0.854909	38.1166	1.3207e-154
LHFPL2	0.854199	37.9995	4.3971e-154
PILRA	0.854036	37.9726	5.7992e-154
OLR1	0.852775	37.7667	4.8304e-153
C1orf38	0.852674	37.7503	5.7222e-153
CASP1	0.850438	37.3915	2.333e-151
SIGLEC10	0.849606	37.2597	9.1439e-151
UCP2	0.848408	37.0719	6.4231e-150
RHOH	0.847891	36.9914	1.4838e-149
OSCAR	0.846743	36.8142	9.3956e-149
C1orf162	0.846664	36.802	1.0669e-148
PLCG2	0.84625	36.7385	2.0694e-148
GMFG	0.84618	36.728	2.3108e-148
SERPINB1	0.845158	36.5724	1.1736e-147
SLA	0.845111	36.5653	1.2645e-147
RCSD1	0.845032	36.5533	1.4326e-147
DENND1C	0.845004	36.5491	1.4983e-147
NCF2	0.844588	36.4862	2.8912e-147
RASAL3	0.84414	36.4189	5.855e-147
MSR1	0.843945	36.3896	7.9538e-147
CSF2RA	0.843211	36.2801	2.5091e-146
STAC3	0.842823	36.2223	4.5981e-146
CCRL2	0.842248	36.1372	1.1246e-145
SIRPB2	0.841701	36.0567	2.6234e-145
PLXDC2	0.841473	36.0232	3.7307e-145
CD14	0.84127	35.9935	5.1006e-145
RBM47	0.841237	35.9886	5.3666e-145
SPN	0.840961	35.9483	8.2032e-145
CD74	0.84089	35.938	9.1482e-145
ADAM28	0.840509	35.8824	1.643e-144
TMC8	0.839947	35.8009	3.8833e-144
RGS19	0.838677	35.6181	2.6766e-143
PTGS1	0.838516	35.5951	3.4135e-143
RNASE2	0.838298	35.5639	4.7463e-143
CXorf21	0.837798	35.4928	1.0081e-142
GBGT1	0.837102	35.3941	2.8668e-142
MS4A7	0.83676	35.3458	4.7866e-142
UNC93B1	0.836261	35.2757	1.007e-141
SYNGR2	0.835925	35.2285	1.6611e-141
RAC2	0.832942	34.8164	1.3356e-139
CSF1R	0.832569	34.7656	2.2976e-139
GPR132	0.831662	34.6426	8.549e-139
CTSC	0.831585	34.6322	9.5589e-139
CTSZ	0.830937	34.5449	2.4305e-138
DOK3	0.830642	34.5054	3.7108e-138
NAGA	0.830024	34.4227	8.9992e-138
NFAM1	0.830017	34.4217	9.0907e-138
SQRDL	0.829715	34.3816	1.3976e-137
LPCAT2	0.82842	34.2103	8.7886e-137
RGS18	0.82785	34.1353	1.9667e-136
DOCK8	0.827072	34.0338	5.8642e-136
TMEM119	0.824615	33.7167	1.7885e-134
SLC11A1	0.824611	33.7163	1.7979e-134
IL16	0.823781	33.6106	5.6307e-134
ATP8B4	0.823735	33.6048	5.9949e-134
PRAM1	0.822185	33.4091	4.9829e-133
GAPT	0.821423	33.3139	1.3991e-132
OLFML3	0.82049	33.198	4.9209e-132
C10orf11	0.820448	33.1928	5.2095e-132
SLC37A2	0.820423	33.1897	5.3834e-132
NCF1B	0.819862	33.1205	1.1426e-131
IL13RA1	0.818742	32.983	5.096e-131
TLR5	0.817833	32.8723	1.7014e-130
CD84	0.817804	32.8687	1.7689e-130
IRF8	0.817683	32.8541	2.0739e-130
TNFRSF1B	0.817461	32.8272	2.7812e-130
C2	0.817212	32.797	3.8633e-130
TMEM156	0.816374	32.6961	1.1623e-129
EBI3	0.816256	32.682	1.356e-129
NUDT16P1	0.815218	32.5579	5.2589e-129
ANKRD58	0.815208	32.5567	5.3287e-129
RAP1A	0.814262	32.4445	1.8182e-128
CD300LF	0.814187	32.4356	2.0038e-128
TRIM38	0.814144	32.4305	2.1185e-128
GIMAP4	0.814061	32.4207	2.3574e-128
SP140	0.814028	32.4168	2.4615e-128
HLA-DOA	0.813897	32.4014	2.9133e-128
INPP5D	0.812361	32.2212	2.0978e-127
BLNK	0.812207	32.2033	2.5539e-127
WDFY4	0.812145	32.1961	2.7642e-127
SUSD3	0.811641	32.1374	5.2624e-127
S100A11	0.810696	32.0281	1.7475e-126
TLR8	0.810544	32.0106	2.1179e-126
HLA-DRA	0.810482	32.0036	2.2891e-126
FTL	0.810379	31.9917	2.6072e-126
NCF1C	0.809091	31.8443	1.3206e-125
PTAFR	0.809024	31.8366	1.4369e-125
CAPG	0.807126	31.6218	1.5325e-124
CORO1A	0.806362	31.5361	3.9452e-124
PIK3CG	0.805817	31.4754	7.7152e-124
SPP1	0.804586	31.3389	3.4911e-123
GPR84	0.80445	31.3238	4.1235e-123
PTPLAD2	0.8044	31.3183	4.3855e-123
GNA15	0.803644	31.2351	1.1014e-122
SCPEP1	0.803616	31.232	1.1396e-122
LILRA1	0.802905	31.1543	2.6959e-122
P2RX4	0.802183	31.0756	6.4484e-122
PTPN7	0.801776	31.0314	1.0528e-121
ARHGAP25	0.801564	31.0085	1.358e-121
SIGLEC7	0.800928	30.9397	2.9118e-121
TGFB1	0.800178	30.8592	7.1249e-121
CXCL16	0.799623	30.7997	1.3796e-120
DENND2D	0.79906	30.7397	2.6891e-120
ITGAX	0.797756	30.6016	1.2515e-119
PDCD1LG2	0.797324	30.556	2.0784e-119
KYNU	0.797279	30.5513	2.1908e-119
AOAH	0.796663	30.4867	4.5015e-119
GPR183	0.796076	30.4253	8.9313e-119
C10orf125	0.794951	30.3083	3.2948e-118
CAP1	0.794724	30.2848	4.2851e-118
CECR1	0.794183	30.229	7.9928e-118
SIPA1	0.793461	30.1547	1.8331e-117
NPC2	0.792593	30.0659	4.9504e-117
RNF130	0.792498	30.0563	5.5154e-117
PLCB2	0.792357	30.0418	6.4818e-117
APOBEC3G	0.789841	29.7876	1.1193e-115
SP100	0.789446	29.7481	1.7439e-115
FGD2	0.788249	29.6288	6.6542e-115
TREML1	0.786627	29.4685	4.0298e-114
IFI30	0.785135	29.3226	2.0828e-113
COL8A2	0.785121	29.3212	2.1145e-113
ADPRH	0.784941	29.3038	2.5739e-113
RNASE3	0.784385	29.2497	4.7324e-113
IL28RA	0.784275	29.2391	5.3315e-113
S100Z	0.783862	29.1992	8.3628e-113
CDCP1	0.782988	29.1149	2.1629e-112
LY96	0.782758	29.0928	2.7753e-112
ZNRF2	0.78237	29.0556	4.2225e-112
C19orf38	0.781965	29.0169	6.5333e-112
CARD9	0.781898	29.0105	7.0243e-112
CD69	0.78175	28.9964	8.2401e-112
GPX1	0.781707	28.9923	8.6269e-112
TMEM149	0.781231	28.947	1.4396e-111
HHEX	0.780596	28.8868	2.8418e-111
SH3TC1	0.780572	28.8845	2.9158e-111
TYMP	0.780197	28.8489	4.3573e-111
C5AR1	0.779215	28.7564	1.2404e-110
KLHL6	0.778418	28.6818	2.8856e-110
HPS3	0.77776	28.6204	5.7815e-110
BATF	0.776768	28.5282	1.6414e-109
GIMAP2	0.776737	28.5253	1.6969e-109
ASCL2	0.775375	28.3998	7.0408e-109
C11orf45	0.77388	28.2631	3.3193e-108
HLA-DPA1	0.773021	28.1851	8.0489e-108
CEACAM21	0.772054	28.0977	2.1721e-107
CIITA	0.771812	28.0758	2.7844e-107
LYL1	0.770874	27.9917	7.2446e-107
TLR6	0.770013	27.9148	1.737e-106
CAPZB	0.769149	27.8381	4.1603e-106
HAMP	0.769076	27.8316	4.4776e-106
MS4A6A	0.768856	27.8122	5.5887e-106
SIGLEC5	0.768146	27.7495	1.1416e-105
OSTF1	0.767797	27.7187	1.6198e-105
SPINT1	0.767639	27.7049	1.8971e-105
HLA-DPB1	0.766938	27.6433	3.8257e-105
RHOG	0.765395	27.5089	1.7725e-104
BCL2A1	0.764733	27.4516	3.4088e-104
FGL2	0.764038	27.3916	6.7601e-104
STAT5A	0.762812	27.2863	2.2494e-103
ARHGAP4	0.762781	27.2837	2.3181e-103
KCNE3	0.761791	27.1993	6.082e-103
MS4A4A	0.761426	27.1682	8.6712e-103
SLC16A3	0.761241	27.1525	1.0384e-102
HLA-E	0.761075	27.1384	1.2198e-102
NLRP3	0.7605	27.0898	2.1268e-102
MAP4K1	0.759975	27.0455	3.5303e-102
SRGN	0.759006	26.9641	8.961e-102
ELF4	0.757166	26.8106	5.1943e-101
HPSE	0.756141	26.7258	1.3725e-100
NECAP2	0.755866	26.7031	1.7797e-100
CYFIP1	0.755245	26.652	3.1992e-100
CYP2S1	0.754929	26.6261	4.3053e-100
CD7	0.754916	26.625	4.3599e-100
FXYD5	0.753306	26.4935	1.9695e-99
CD226	0.753259	26.4897	2.0576e-99
CREG1	0.752451	26.4242	4.3644e-99
HLA-DRB1	0.75232	26.4136	4.9322e-99
PLB1	0.752276	26.4101	5.1349e-99
LILRB2	0.752073	26.3936	6.2027e-99
DRAM2	0.750892	26.2985	1.84838e-98
ANKRD22	0.750609	26.2758	2.40022e-98
CACNA2D4	0.750353	26.2552	3.03903e-98
GYPC	0.749999	26.227	4.20548e-98
SELPLG	0.749947	26.2228	4.41231e-98
SLC1A5	0.749059	26.152	9.95204e-98
TLR10	0.745843	25.8982	1.84333e-96
CTSB	0.745203	25.8483	3.27673e-96
APOB48R	0.744445	25.7892	6.46461e-96
SLC2A9	0.743781	25.7378	1.16949e-95
FCGRT	0.743057	25.6818	2.22832e-95
SIGLEC11	0.740685	25.4998	1.81395e-94
A2M	0.740556	25.4899	2.03337e-94
RARRES3	0.739717	25.4261	4.24182e-94
KLHDC7B	0.739617	25.4186	4.62862e-94
VAMP3	0.739422	25.4038	5.49148e-94
PLA2G15	0.739406	25.4025	5.5696e-94
PDE6G	0.738598	25.3414	1.12738e-93
SLCO2B1	0.738377	25.3248	1.36567e-93
HMHA1	0.738051	25.3002	1.81315e-93
B4GALT1	0.737282	25.2424	3.53271e-93
GAL3ST4	0.736415	25.1775	7.47265e-93
SLC24A6	0.736288	25.168	8.33309e-93
STX11	0.735932	25.1415	1.13234e-92
ST14	0.735547	25.1128	1.57669e-92
CASP4	0.73463	25.0447	3.4602e-92
CRYBB1	0.734419	25.0291	4.14392e-92
FCGBP	0.734092	25.0049	5.47776e-92
CARD11	0.733891	24.9901	6.50295e-92
IL10	0.733853	24.9873	6.71694e-92
TRPV2	0.733628	24.9707	8.13151e-92
ARRB2	0.73273	24.9046	1.74417e-91
VNN1	0.732206	24.8662	2.71884e-91
FAM177B	0.732062	24.8557	3.07009e-91
PLBD1	0.732006	24.8516	3.22036e-91
MKNK1	0.731721	24.8308	4.09574e-91
TMSL3	0.731716	24.8304	4.11421e-91
RUNX2	0.731376	24.8056	5.47884e-91
MFNG	0.731348	24.8035	5.61107e-91
CASP8	0.730914	24.7719	8.0848e-91
VASP	0.729753	24.6877	2.13954e-90
RNF135	0.729562	24.6738	2.51146e-90
PLEKHO2	0.729287	24.654	3.15861e-90
AGTRAP	0.729278	24.6534	3.18273e-90
MGST2	0.72897	24.6311	4.11621e-90
DENND3	0.728507	24.5977	6.05383e-90
HMOX1	0.728412	24.5909	6.54914e-90
GAB3	0.728329	24.5849	7.01875e-90
PLD4	0.727668	24.5375	1.21447e-89
CLEC4A	0.727429	24.5204	1.48002e-89
CD40	0.727191	24.5034	1.80226e-89
P2RY6	0.726574	24.4593	3.00152e-89
LPAR6	0.726189	24.4319	4.12124e-89
TNFSF12-TNFSF13	0.726174	24.4308	4.17255e-89
FAM26F	0.72596	24.4156	4.97556e-89
SP140L	0.72596	24.4156	4.97556e-89
RUNX1	0.725067	24.3523	1.03538e-88
NAPSB	0.724956	24.3443	1.13473e-88
APOBEC3C	0.72206	24.1408	1.19662e-87
SLAMF8	0.721952	24.1332	1.30599e-87
SIGLEC8	0.720386	24.0242	4.61036e-87
EMR1	0.720272	24.0164	5.05098e-87
SHMT1	0.719515	23.964	9.26481e-87
B2M	0.718544	23.8971	2.00897e-86
ARHGAP27	0.718386	23.8862	2.27969e-86
VNN2	0.71823	23.8755	2.58017e-86
CARD16	0.718182	23.8722	2.68105e-86
PRKCD	0.717678	23.8376	3.99947e-86
MFSD1	0.717288	23.8109	5.44871e-86
CSTA	0.716307	23.744	1.18237e-85
PIK3R6	0.714422	23.6162	5.19795e-85
C9orf167	0.714244	23.6042	5.97173e-85
LOC606724	0.713659	23.5648	9.42861e-85
LRRC33	0.713297	23.5404	1.25032e-84
NINJ1	0.712304	23.4739	2.70277e-84
RAB32	0.71108	23.3922	6.95857e-84
SYTL3	0.711003	23.3871	7.38586e-84
DHRS3	0.710862	23.3777	8.23415e-84
ACPP	0.710664	23.3646	9.58987e-84
CTBS	0.710636	23.3627	9.80063e-84
FUCA1	0.71027	23.3384	1.29843e-83
TLR3	0.709478	23.286	2.38407e-83
EMB	0.709415	23.2818	2.50158e-83
C1orf200	0.708406	23.2153	5.40534e-83
EMR2	0.708161	23.1992	6.51697e-83
GBP2	0.707894	23.1816	7.98568e-83
ST8SIA4	0.707623	23.1639	9.80813e-83
IL2RG	0.707213	23.137	1.33857e-82
LTC4S	0.707055	23.1267	1.50987e-82
CASP5	0.705806	23.0452	3.8788e-82
SERTAD3	0.705608	23.0323	4.5046e-82
SLC17A9	0.705578	23.0304	4.60575e-82
SHKBP1	0.705549	23.0285	4.70791e-82
LILRB3	0.704735	22.9757	8.67955e-82
AK2	0.704539	22.963	1.00576e-81
TSPO	0.704515	22.9614	1.02393e-81
LTBR	0.704423	22.9555	1.09747e-81
CHI3L2	0.70404	22.9307	1.46131e-81
TM6SF1	0.703501	22.8959	2.1871e-81
NMI	0.703348	22.8861	2.45038e-81
RILPL2	0.703078	22.8687	2.99804e-81
MLKL	0.70171	22.781	8.28465e-81
GLRX	0.701358	22.7585	1.07486e-80
ICOSLG	0.701215	22.7493	1.19536e-80
ASGR2	0.70026	22.6885	2.41915e-80

## Sheet: LGALS9
Gene	Correlation coefficient	T-score	p
LGALS9	1
SPI1	0.948518	69.2694	2.1953e-256
ABI3	0.939505	63.4413	1.709e-218
CD37	0.929315	58.2071	2.3341e-219
GPSM3	0.926292	56.8601	2.4726e-234
SLC15A3	0.924925	56.2767	4.6145e-158
HAVCR2	0.920018	54.3031	8.09078e-220
FERMT3	0.919703	54.1823	3.4333e-220
PARVG	0.915968	52.8007	6.5957e-210
STXBP2	0.913264	51.8546	8.4472e-195
TREM2	0.913234	51.8443	4.2984e-247
ITGB2	0.913091	51.7954	1.8977e-273
PTPN6	0.912911	51.7341	1.4049e-213
BTK	0.912615	51.6337	2.1586e-283
TYROBP	0.911594	51.2907	1.6005e-234
MYO1F	0.908101	50.1598	8.3162e-211
PYCARD	0.907628	50.0114	5.948e-167
CYBA	0.907365	49.929	9.2444e-192
SASH3	0.907304	49.9101	7.5488e-296
RNASET2	0.906606	49.6942	1.6623e-205
LAT2	0.905702	49.4179	1.719e-282
LILRB4	0.905318	49.3016	6.407e-243
LY86	0.904696	49.1147	3.4605e-259
WAS	0.903262	48.6904	1.0246e-181
LAPTM5	0.902224	48.3887	0
C17orf60	0.901774	48.2593	4.2973e-219
C1QC	0.900197	47.8128	7.3653e-222
GNGT2	0.897746	47.1379	1.258e-195
CD68	0.89664	46.8409	2.8685e-217
STAC3	0.896205	46.7256	4.5981e-146
TNFAIP8L2	0.895769	46.6104	7.1287e-211
LAIR1	0.895501	46.5398	1.1825e-255
ITGAL	0.894289	46.2244	6.1725e-176
VAV1	0.893083	45.9156	6.5283e-230
CD53	0.892351	45.7305	0
SLC7A7	0.89176	45.5826	2.3561e-231
RIPK3	0.890557	45.2846	2.0496e-192
DEF6	0.889875	45.1178	9.3587e-158
HCK	0.886865	44.3981	9.807e-237
C1QB	0.883408	43.6046	3.2531e-209
IL18	0.882915	43.494	1.3393e-210
NCKAP1L	0.882771	43.4619	3.265e-278
CEBPA	0.881128	43.0991	3.1366e-176
CD86	0.879051	42.6501	4.212e-289
TBXAS1	0.877938	42.4141	1.6501e-219
UNC93B1	0.877298	42.2797	1.007e-141
APBB1IP	0.87707	42.232	6.6623e-212
LILRB1	0.876245	42.0607	1.6154e-215
AIF1	0.875294	41.8652	1.8015e-211
FCER1G	0.874628	41.7293	7.7982e-221
ARPC1B	0.874539	41.7114	1.2937e-163
HCST	0.873797	41.5615	2.4931e-185
HCLS1	0.873295	41.4608	7.2958e-189
CD33	0.87284	41.37	1.3953e-221
ADORA3	0.872561	41.3146	4.248e-255
ARL11	0.871459	41.0972	2.1514e-247
RASGRP4	0.870843	40.9769	2.7621e-205
ARHGDIB	0.870592	40.9281	4.2231e-191
CD300C	0.870105	40.8338	3.3862e-219
IRF5	0.869959	40.8056	1.0201e-172
LILRA2	0.86899	40.6195	4.4139e-183
ADAP2	0.868943	40.6107	5.1971e-211
PIK3R5	0.868183	40.4662	1.1953e-195
DENND1C	0.86747	40.3318	1.4983e-147
CD4	0.867303	40.3005	4.6581e-187
IL12RB1	0.867067	40.2563	6.9243e-187
RPS6KA1	0.864894	39.8543	1.5658e-186
ARHGAP9	0.863947	39.6819	6.9528e-182
UCP2	0.863724	39.6416	6.4231e-150
FBP1	0.863666	39.6312	2.1503e-173
SYK	0.862255	39.3781	3.2799e-234
FCGR1A	0.86219	39.3665	9.9878e-232
C1QA	0.862158	39.3608	1.3611e-171
LST1	0.862057	39.343	1.3823e-178
VAMP8	0.861491	39.2426	1.242e-180
CYTH4	0.86127	39.2037	2.9966e-200
TMC8	0.861086	39.1713	3.8833e-144
NCF4	0.860099	38.9985	3.3739e-170
BIN2	0.85987	38.9585	2.372e-184
NCF1	0.858841	38.7805	1.2021e-166
RASAL3	0.858357	38.6974	5.855e-147
CMTM7	0.857871	38.6144	1.29e-155
C3AR1	0.85758	38.5649	5.3872e-238
CD300A	0.856561	38.3925	3.1394e-211
RGS10	0.856558	38.392	2e-176
RGS19	0.854067	37.9778	2.6766e-143
HLA-DMA	0.853566	37.8956	5.454e-166
HLA-DMB	0.853278	37.8486	1.4579e-208
FAM113B	0.853208	37.8371	2.8947e-156
LPAR5	0.853047	37.8109	3.4029e-204
SIPA1	0.85295	37.7952	1.8331e-117
PILRA	0.852023	37.645	5.7992e-154
LRRC25	0.8519	37.6253	6.4847e-181
CD180	0.851802	37.6094	1.062e-155
ALOX5	0.850702	37.4333	1.3693e-223
PRAM1	0.85061	37.4188	4.9829e-133
CSF3R	0.84967	37.2698	3.9179e-190
SAMSN1	0.848074	37.0199	3.3757e-250
OSCAR	0.847543	36.9376	9.3956e-149
KCNQ1	0.847197	36.884	8.072e-157
TRAF3IP3	0.845498	36.6239	1.3207e-154
CCR1	0.844113	36.4149	2.0917e-197
ARHGAP30	0.842603	36.1898	2.7891e-171
SP140	0.842151	36.1229	2.4615e-128
EVI2B	0.842105	36.1162	4.1615e-205
PLEK	0.841489	36.0256	5.6715e-209
CTSS	0.840531	35.8857	3.2884e-195
ANKRD58	0.840324	35.8556	5.3287e-129
SIGLEC9	0.837715	35.4809	3.8103e-199
TFEC	0.837558	35.4586	1.3254e-200
C3	0.836677	35.3342	1.3243e-204
IKZF1	0.836254	35.2747	4.1241e-180
ARHGAP15	0.832804	34.7975	2.8813e-174
C16orf54	0.832631	34.774	1.0775e-173
CD74	0.831778	34.6583	9.1482e-145
DAPP1	0.830899	34.5397	1.0949e-197
LYL1	0.830874	34.5364	7.2446e-107
RHBDF2	0.830845	34.5326	2.4814e-157
FCGR1C	0.830388	34.4713	5.0836e-168
GMFG	0.830385	34.471	2.3108e-148
RNASE6	0.830104	34.4334	5.988e-185
DOCK2	0.82903	34.2907	2.862e-179
FCGR1B	0.828953	34.2806	9.9353e-171
C1orf162	0.827112	34.0389	1.0669e-148
SPN	0.825639	33.8482	8.2032e-145
GBGT1	0.82552	33.8328	2.8668e-142
CASP1	0.825462	33.8254	2.333e-151
CCR5	0.8249	33.7532	2.3339e-163
CYTIP	0.824301	33.6767	2.0899e-164
CTSZ	0.824124	33.6541	2.4305e-138
RAC2	0.823397	33.5619	1.3356e-139
SLC37A2	0.823091	33.5232	5.3834e-132
SCIN	0.821748	33.3545	1.8846e-193
SYNGR2	0.821491	33.3224	1.6611e-141
TLR2	0.819692	33.0995	1.5584e-181
LCP1	0.818628	32.969	4.1126e-180
NLRC4	0.81843	32.945	3.5934e-170
CYBB	0.818418	32.9435	1.265e-198
C10orf11	0.8183	32.9291	5.2095e-132
TMEM106A	0.817915	32.8822	8.6816e-167
ITGAX	0.816497	32.7109	1.2515e-119
CARD9	0.81587	32.6357	7.0243e-112
MNDA	0.815796	32.6268	3.7087e-163
CCRL2	0.815609	32.6046	1.1246e-145
ARHGAP4	0.815391	32.5785	2.3181e-103
C17orf87	0.814787	32.5067	9.9262e-159
LCP2	0.813409	32.3439	2.8107e-163
PLCG2	0.813064	32.3034	2.0694e-148
LOC100233209	0.813017	32.2979	2.6804e-183
SERPINA1	0.812814	32.2742	3.2023e-175
DOK3	0.812679	32.2584	3.7108e-138
APOC2	0.812013	32.1807	3.8531e-162
APOB48R	0.811951	32.1734	6.46461e-96
IGSF6	0.811828	32.1592	2.4276e-165
P2RX4	0.810828	32.0434	6.4484e-122
C1orf38	0.810152	31.9656	5.7222e-153
SLC2A5	0.809946	31.942	7.1269e-170
TLR7	0.808682	31.7976	1.2489e-185
ASCL2	0.808385	31.764	7.0408e-109
HPGDS	0.808273	31.7513	3.0711e-163
EBI3	0.808254	31.7491	1.356e-129
TGFB1	0.80823	31.7464	7.1249e-121
MAP4K1	0.807899	31.709	3.5303e-102
LPXN	0.807706	31.6872	2.6529e-156
ITGAM	0.807292	31.6405	7.4479e-170
RHOG	0.806801	31.5853	1.7725e-104
CD300LF	0.806613	31.5643	2.0038e-128
C10orf125	0.805891	31.4836	3.2948e-118
KCNK13	0.805886	31.483	6.4928e-186
CAPG	0.804967	31.381	1.5325e-124
FXYD5	0.804297	31.3069	1.9695e-99
INPP5D	0.803346	31.2025	2.0978e-127
NCF2	0.802814	31.1443	2.8912e-147
NAGA	0.801813	31.0354	8.9992e-138
IL10RA	0.801789	31.0328	2.6661e-159
GIMAP4	0.801571	31.0092	2.3574e-128
ARHGAP25	0.801016	30.9493	1.358e-121
TYMP	0.800975	30.9448	4.3573e-111
HMHA1	0.800726	30.918	1.81315e-93
SQRDL	0.80012	30.853	1.3976e-137
GPX1	0.8001	30.8507	8.6269e-112
SH3TC1	0.800098	30.8506	2.9158e-111
DENND2D	0.799551	30.7921	2.6891e-120
FTL	0.799429	30.7791	2.6072e-126
CECR1	0.798602	30.691	7.9928e-118
FCGR2A	0.798341	30.6634	4.8459e-172
RCSD1	0.797254	30.5487	1.4326e-147
CD14	0.796604	30.4804	5.1006e-145
PLCB2	0.796333	30.4522	6.4818e-117
LYN	0.795999	30.4173	4.8399e-157
TNFRSF1B	0.795847	30.4015	2.7812e-130
NFAM1	0.795451	30.3602	9.0907e-138
OLFML3	0.794235	30.2344	4.9209e-132
GPR65	0.793714	30.1807	2.7562e-162
CORO1A	0.792979	30.1053	3.9452e-124
RHOH	0.792386	30.0449	1.4838e-149
C19orf38	0.791987	30.0043	6.5333e-112
TMEM149	0.791911	29.9965	1.4396e-111
CXCL16	0.791012	29.9055	1.3796e-120
FGD2	0.790265	29.8301	6.6542e-115
CD7	0.788729	29.6765	4.3599e-100
IL16	0.787199	29.5249	5.6307e-134
NCF1B	0.78713	29.5181	1.1426e-131
TRIM38	0.787126	29.5176	2.1185e-128
C2	0.785931	29.4003	3.8633e-130
FCGR3A	0.785768	29.3843	9.6837e-162
WDFY4	0.785533	29.3614	2.7642e-127
FYB	0.785526	29.3608	1.0782e-163
PIK3AP1	0.785524	29.3606	8.6504e-157
CLEC7A	0.785098	29.3191	3.1608e-155
NCF1C	0.784848	29.2947	1.3206e-125
TMEM156	0.784612	29.2718	1.1623e-129
RBM47	0.784316	29.2431	5.3666e-145
S100A11	0.783427	29.1572	1.7475e-126
BATF	0.782397	29.0583	1.6414e-109
SP100	0.782375	29.0561	1.7439e-115
C12orf59	0.78227	29.0461	9.8097e-161
SLC11A1	0.78185	29.006	1.7979e-134
PTGS1	0.781836	29.0046	3.4135e-143
UBA7	0.781025	28.9274	4.44845e-79
PTPRC	0.780817	28.9076	4.0055e-183
OLR1	0.780482	28.8759	4.8304e-153
GYPC	0.780328	28.8614	4.20548e-98
GPR132	0.780168	28.8463	8.549e-139
STAT5A	0.779436	28.7773	2.2494e-103
APOBEC3G	0.778259	28.6669	1.1193e-115
CSF2RB	0.778156	28.6572	1.145e-166
MS4A7	0.778071	28.6494	4.7866e-142
ALOX5AP	0.777912	28.6345	7.1795e-179
PTPN7	0.777862	28.6299	1.0528e-121
SLA	0.777843	28.628	1.2645e-147
SCPEP1	0.77762	28.6073	1.1396e-122
CSF2RA	0.777042	28.5536	2.5091e-146
SUSD3	0.776558	28.5088	5.2624e-127
TNFSF8	0.776417	28.4958	8.2228e-170
CTSC	0.776194	28.4751	9.5589e-139
NPC2	0.775042	28.3692	4.9504e-117
SIGLEC10	0.773956	28.27	9.1439e-151
FPR1	0.773778	28.2538	3.6718e-199
VSIG4	0.773677	28.2445	1.9798e-166
IFI30	0.773478	28.2265	2.0828e-113
TMEM119	0.772821	28.1669	1.7885e-134
SIGLEC7	0.772737	28.1593	2.9118e-121
BLNK	0.772704	28.1563	2.5539e-127
TREML1	0.771933	28.0867	4.0298e-114
SERPINB1	0.771573	28.0544	1.1736e-147
LHFPL2	0.771394	28.0383	4.3971e-154
HLA-DOA	0.768205	27.7546	2.9133e-128
GAPT	0.768112	27.7464	1.3991e-132
CSF1R	0.764762	27.4541	2.2976e-139
GPR34	0.763819	27.3727	1.1114e-171
SIRPB2	0.763349	27.3323	2.6234e-145
RNF130	0.76328	27.3264	5.5154e-117
FCGRT	0.761988	27.216	2.22832e-95
ADAM28	0.760995	27.1316	1.643e-144
ADPRH	0.760857	27.12	2.5739e-113
CXorf21	0.760335	27.0758	1.0081e-142
TLR1	0.757551	26.8426	8.7183e-167
NUDT16P1	0.757451	26.8343	5.2589e-129
HLA-DPB1	0.757316	26.823	3.8257e-105
SLC24A6	0.75715	26.8093	8.33309e-93
GPR160	0.756489	26.7545	1.0745e-167
HLA-E	0.756335	26.7418	1.2198e-102
IRF8	0.75629	26.7381	2.0739e-130
PLXDC2	0.755818	26.6991	3.7307e-145
MSR1	0.754797	26.6153	7.9538e-147
GIMAP2	0.754461	26.5877	1.6969e-109
LPCAT2	0.753956	26.5465	8.7886e-137
KLHL6	0.753696	26.5253	2.8856e-110
HLA-DRA	0.753168	26.4823	2.2891e-126
COL8A2	0.751489	26.3465	2.1145e-113
IL13RA1	0.749928	26.2213	5.096e-131
IL28RA	0.74957	26.1927	5.3315e-113
LOC606724	0.749304	26.1715	9.42861e-85
TLR5	0.749216	26.1645	1.7014e-130
CNPY3	0.749001	26.1474	3.54527e-63
RNASE2	0.748376	26.0977	4.7463e-143
DOCK8	0.747028	25.9912	5.8642e-136
GAB3	0.74701	25.9899	7.01875e-90
PDE6G	0.746802	25.9735	1.12738e-93
ARRB2	0.746658	25.9622	1.74417e-91
PTPLAD2	0.74615	25.9223	4.3855e-123
TCIRG1	0.74605	25.9145	4.61986e-76
FAM78A	0.746045	25.9141	2.7605e-77
RARRES3	0.745746	25.8907	4.24182e-94
PSMB10	0.745528	25.8737	2.23214e-67
CARD11	0.744944	25.8281	6.50295e-92
SLC1A5	0.744778	25.8152	9.95204e-98
CAPZB	0.743627	25.7258	4.1603e-106
S100Z	0.743456	25.7126	8.3628e-113
RNF135	0.743394	25.7078	2.51146e-90
PLA2G15	0.743357	25.7049	5.5696e-94
SPINT1	0.743001	25.6775	1.8971e-105
LY96	0.742265	25.6208	2.7753e-112
DOK1	0.742193	25.6152	6.50549e-78
AGTRAP	0.742032	25.6029	3.18273e-90
MLKL	0.741745	25.5808	8.28465e-81
SIGLEC11	0.741594	25.5693	1.81395e-94
CIITA	0.741488	25.5612	2.7844e-107
HLA-DPA1	0.74071	25.5017	8.0489e-108
SHKBP1	0.740365	25.4754	4.70791e-82
GRN	0.740357	25.4748	4.60271e-69
BST2	0.740225	25.4648	1.25135e-71
HLA-DRB1	0.739898	25.4399	4.9322e-99
TNNI2	0.738766	25.3541	1.23875e-79
HHEX	0.738557	25.3383	2.8418e-111
LILRB2	0.737742	25.2769	6.2027e-99
ARHGAP27	0.736796	25.206	2.27969e-86
PIK3R6	0.736418	25.1777	5.19795e-85
KLHDC7B	0.736386	25.1753	4.62862e-94
CEACAM21	0.736247	25.1649	2.1721e-107
PTCRA	0.735453	25.1058	1.13055e-79
MGST2	0.734265	25.0177	4.11621e-90
KYNU	0.733747	24.9795	2.1908e-119
PDCD1LG2	0.733693	24.9755	2.0784e-119
SP140L	0.733121	24.9334	4.97556e-89
CYP2S1	0.73282	24.9113	4.3053e-100
CARD16	0.732228	24.8678	2.68105e-86
IL2RG	0.732001	24.8512	1.33857e-82
MS4A6A	0.731998	24.851	5.5887e-106
ANKRD22	0.731275	24.7982	2.40022e-98
ELF4	0.730956	24.775	5.1943e-101
AOAH	0.729213	24.6486	4.5015e-119
RAP1A	0.728838	24.6216	1.8182e-128
ATP8B4	0.728016	24.5625	5.9949e-134
MGAT1	0.727914	24.5552	2.65893e-75
GAL3ST4	0.727164	24.5014	7.47265e-93
NECAP2	0.727132	24.4992	1.7797e-100
PLD4	0.726503	24.4543	1.21447e-89
LTC4S	0.726492	24.4535	1.50987e-82
GNA15	0.725676	24.3954	1.1014e-122
IL4I1	0.725192	24.3611	1.17697e-75
GPR84	0.72387	24.2677	4.1235e-123
DHRS3	0.722569	24.1763	8.23415e-84
VASP	0.722396	24.1642	2.13954e-90
C1orf200	0.722269	24.1554	5.40534e-83
TSPO	0.721473	24.0998	1.02393e-81
MFNG	0.721163	24.0782	5.61107e-91
C9orf167	0.720459	24.0293	5.97173e-85
NAPSB	0.720398	24.0251	1.13473e-88
LTBR	0.720036	24	1.09747e-81
SIGLEC5	0.719792	23.9831	1.1416e-105
LILRA1	0.718686	23.9069	2.6959e-122
NINJ1	0.717381	23.8173	2.70277e-84
SPP1	0.717171	23.803	3.4911e-123
C11orf45	0.716807	23.7781	3.3193e-108
APOC1	0.716602	23.7641	1.39216e-74
LRRC33	0.715651	23.6994	1.25032e-84
BCL2A1	0.715372	23.6805	3.4088e-104
RGS18	0.714934	23.6508	1.9667e-136
RILPL2	0.713228	23.5358	2.99804e-81
TMEM109	0.712284	23.4725	8.86091e-80
TLR8	0.712056	23.4573	2.1179e-126
SCAMP2	0.711116	23.3946	2.51956e-54
ST14	0.710998	23.3868	1.57669e-92
SHMT1	0.710976	23.3853	9.26481e-87
LILRB3	0.710928	23.3821	8.67955e-82
SELPLG	0.710852	23.3771	4.41231e-98
SLC16A3	0.710843	23.3764	1.0384e-102
ALDH3B1	0.710813	23.3745	4.83792e-77
ZDHHC12	0.710153	23.3307	5.71838e-78
MX2	0.710028	23.3224	1.00197e-72
REEP4	0.709902	23.314	1.98061e-67
DTX2	0.709892	23.3133	5.36822e-57
SLC17A9	0.70766	23.1663	4.60575e-82
HLA-B	0.706808	23.1105	1.79901e-69
HAMP	0.706567	23.0948	4.4776e-106
SLAMF8	0.706263	23.0749	1.30599e-87
CD84	0.705457	23.0225	1.7689e-130
CD69	0.704779	22.9785	8.2401e-112
A2M	0.704761	22.9774	2.03337e-94
IL15RA	0.704045	22.931	8.63288e-77
CDCP1	0.703622	22.9037	2.1629e-112
B2M	0.703543	22.8987	2.00897e-86
MS4A4A	0.70344	22.892	8.6712e-103
NMI	0.702588	22.8372	2.45038e-81
CASP4	0.702456	22.8288	3.4602e-92
CYBASC3	0.7022	22.8124	3.16993e-74
FES	0.702092	22.8054	5.33148e-76
CD40	0.702001	22.7996	1.80226e-89
SERPINF2	0.701801	22.7868	1.18978e-64
HPSE	0.701017	22.7367	1.3725e-100
P2RY6	0.700712	22.7173	3.00152e-89
RTP4	0.700617	22.7112	1.26562e-63
MS4A14	0.700007	22.6725	8.02043e-79
