# Supplementary material for: Association of Tim-3/Gal-9 Axis with NLRC4 Inflammasome in Glioma Malignancy: Tim-3/Gal-9 Induce the NLRC4 Inflammasome
Source: Int J Mol Sci. 2022 Feb 12;23(4):2028. doi: 10.3390/ijms23042028 (PMC8878774; doi:10.3390/ijms23042028)
Supplement: Supplementary file 1 [file ijms-23-02028-s001.zip › Table S5.csv]

Supplementary Table S5. Correlation coefficient hierarchical clustering.
Gene	Clusters
A2M	1
ADAM28	1
ADPRH	1
AGTRAP	1
ANKRD22	1
ANKRD58	1
AOAH	1
APBB1IP	1
APOB48R	1
APOBEC3G	1
APOC2	1
ARHGAP27	1
ARHGAP4	1
ARRB2	1
ASCL2	1
ATP8B4	1
B2M	1
BATF	1
BCL2A1	1
BIN2	1
BLNK	1
C10orf11	1
C10orf125	1
C11orf45	1
C12orf59	1
C19orf38	1
C1orf200	1
C2	1
C9orf167	1
CAPG	1
CAPZB	1
CARD11	1
CARD16	1
CARD9	1
CASP4	1
CD300LF	1
CD40	1
CD69	1
CD7	1
CD84	1
CDCP1	1
CEACAM21	1
COL8A2	1
CORO1A	1
CSF1R	1
CSF2RA	1
CTSC	1
CXCL16	1
CYP2S1	1
DENND2D	1
DHRS3	1
DOCK2	1
DOCK8	1
EBI3	1
ELF4	1
FCGR1B	1
FCGR1C	1
FCGRT	1
FGD2	1
FTL	1
FXYD5	1
GAB3	1
GAL3ST4	1
GIMAP2	1
GNA15	1
GPR34	1
GPR84	1
GPX1	1
GYPC	1
HAMP	1
HHEX	1
HLA-DPA1	1
HLA-DPB1	1
HLA-DRA	1
HLA-DRB1	1
HLA-E	1
HMHA1	1
HPGDS	1
HPSE	1
IFI30	1
IKZF1	1
IL28RA	1
IL2RG	1
INPP5D	1
IRF8	1
ITGAM	1
ITGAX	1
KLHDC7B	1
KLHL6	1
KYNU	1
LILRA1	1
LILRB2	1
LILRB3	1
LOC606724	1
LPAR5	1
LPCAT2	1
LRRC33	1
LTBR	1
LTC4S	1
LY96	1
LYL1	1
MAP4K1	1
MFNG	1
MGST2	1
MLKL	1
MS4A4A	1
MS4A6A	1
MSR1	1
NAPSB	1
NCF1B	1
NCF1C	1
NECAP2	1
NINJ1	1
NMI	1
NPC2	1
NUDT16P1	1
OLR1	1
P2RX4	1
P2RY6	1
PDCD1LG2	1
PDE6G	1
PIK3R6	1
PLA2G15	1
PLCB2	1
PLD4	1
PLXDC2	1
PRAM1	1
PTPN7	1
RAP1A	1
RARRES3	1
RASAL3	1
RGS10	1
RGS18	1
RHBDF2	1
RHOG	1
RILPL2	1
RNF130	1
RNF135	1
S100A11	1
S100Z	1
SELPLG	1
SERPINB1	1
SH3TC1	1
SHKBP1	1
SHMT1	1
SIGLEC11	1
SIGLEC5	1
SIGLEC7	1
SLAMF8	1
SLC11A1	1
SLC16A3	1
SLC17A9	1
SLC1A5	1
SLC24A6	1
SLC2A5	1
SP100	1
SP140L	1
SPINT1	1
SPP1	1
SQRDL	1
ST14	1
STAT5A	1
SUSD3	1
SYNGR2	1
TLR5	1
TLR7	1
TMC8	1
TMEM119	1
TMEM149	1
TMEM156	1
TREML1	1
TSPO	1
TYMP	1
VASP	1
WDFY4	1
ABI3	2
ADAP2	2
ADORA3	2
AIF1	2
ALOX5	2
ALOX5AP	2
ARHGAP15	2
ARHGAP25	2
ARHGAP30	2
ARHGAP9	2
ARHGDIB	2
ARL11	2
ARPC1B	2
BTK	2
C16orf54	2
C17orf60	2
C17orf87	2
C1orf162	2
C1orf38	2
C1QA	2
C1QB	2
C1QC	2
C3	2
C3AR1	2
CASP1	2
CCR1	2
CCR5	2
CCRL2	2
CD14	2
CD180	2
CD300A	2
CD300C	2
CD33	2
CD37	2
CD4	2
CD53	2
CD68	2
CD74	2
CD86	2
CEBPA	2
CECR1	2
CIITA	2
CLEC7A	2
CMTM7	2
CSF2RB	2
CSF3R	2
CTSS	2
CTSZ	2
CXorf21	2
CYBA	2
CYBB	2
CYTH4	2
CYTIP	2
DAPP1	2
DEF6	2
DENND1C	2
DOK3	2
EVI2B	2
FAM113B	2
FBP1	2
FCER1G	2
FCGR1A	2
FCGR2A	2
FCGR3A	2
FERMT3	2
FPR1	2
FYB	2
GAPT	2
GBGT1	2
GIMAP4	2
GMFG	2
GNGT2	2
GPR132	2
GPR160	2
GPR65	2
GPSM3	2
HAVCR2	2
HCK	2
HCLS1	2
HCST	2
HLA-DMA	2
HLA-DMB	2
HLA-DOA	2
IGSF6	2
IL10RA	2
IL12RB1	2
IL13RA1	2
IL16	2
IL18	2
IRF5	2
ITGAL	2
ITGB2	2
KCNK13	2
KCNQ1	2
LAIR1	2
LAPTM5	2
LAT2	2
LCP1	2
LCP2	2
LGALS9	2
LHFPL2	2
LILRA2	2
LILRB1	2
LILRB4	2
LOC100233209	2
LPXN	2
LRRC25	2
LST1	2
LY86	2
LYN	2
MNDA	2
MS4A7	2
MYO1F	2
NAGA	2
NCF1	2
NCF2	2
NCF4	2
NCKAP1L	2
NFAM1	2
NLRC4	2
OLFML3	2
OSCAR	2
PARVG	2
PIK3AP1	2
PIK3R5	2
PILRA	2
PLCG2	2
PLEK	2
PTGS1	2
PTPLAD2	2
PTPN6	2
PTPRC	2
PYCARD	2
RAC2	2
RASGRP4	2
RBM47	2
RCSD1	2
RGS19	2
RHOH	2
RIPK3	2
RNASE2	2
RNASE6	2
RNASET2	2
RPS6KA1	2
SAMSN1	2
SASH3	2
SCIN	2
SCPEP1	2
SERPINA1	2
SIGLEC10	2
SIGLEC9	2
SIPA1	2
SIRPB2	2
SLA	2
SLC15A3	2
SLC37A2	2
SLC7A7	2
SP140	2
SPI1	2
SPN	2
STAC3	2
STXBP2	2
SYK	2
TBXAS1	2
TFEC	2
TGFB1	2
TLR1	2
TLR2	2
TLR8	2
TMEM106A	2
TNFAIP8L2	2
TNFRSF1B	2
TNFSF8	2
TRAF3IP3	2
TREM2	2
TRIM38	2
TYROBP	2
UCP2	2
UNC93B1	2
VAMP8	2
VAV1	2
VSIG4	2
WAS	2
